# Supplementary material for: The adaptive benefit of evolved increases in hemoglobin-O2 affinity is contingent on tissue O2 diffusing capacity in high-altitude deer mice
Source: PubMed Central journal article supplement (PMC8218429; doi:10.1186/s12915-021-01059-4), 2021-06-22
Supplement: 12915_2021_1059_MOESM3_ESM.pdf [file 12915_2021_1059_MOESM3_ESM.pdf]

### **Supplementary Tables for**

The adaptive benefit of evolved increases in hemoglobin-O<sub>2</sub> affinity is contingent on tissue O<sub>2</sub> diffusing capacity in high-altitude deer mice

Oliver H. Wearing, Catherine M. Ivy, Natalia Gutiérrez-Pinto, Jonathan P. Velotta, Shane C. Campbell-Staton, Chandrasekhar Natarajan, Zachary A. Cheviron, Jay F. Storz, and Graham R. Scott

Corresponding author: Oliver H. Wearing

Email: [wearingo@mcmaster.ca](mailto:wearingo@mcmaster.ca)

**Table S1.** Effects of inspired  $PO_2$  and acclimation to hypoxia on cardiorespiratory physiology of  $F_2$  inter-population hybrid deer mice at  $\dot{V}O_{2max}$ , without accounting for effects of genotype.

| Trait                          | Animal mass                            | Acclimation                             | $PO_2$                                  | Interaction <sup>1</sup>               |
|--------------------------------|----------------------------------------|-----------------------------------------|-----------------------------------------|----------------------------------------|
| $\dot{V}O_{2max}$ <sup>2</sup> | $F_{1,98} = 37.9184$<br>$P < 0.0001^*$ | $F_{1,98} = 16.8561$<br>$P = 0.0001^*$  | $F_{1,98} = 94.4737$<br>$P < 0.0001^*$  | NS                                     |
| Arterial $O_2$ saturation      | $F_{1,98} = 3.0602$<br>$P = 0.0909$    | $F_{1,98} = 14.5282$<br>$P = 0.0003^*$  | $F_{1,98} = 181.5338$<br>$P < 0.0001^*$ | $F_{1,98} = 13.0275$<br>$P = 0.0006^*$ |
| Heart rate <sup>2</sup>        | $F_{1,97} = 4.3086$<br>$P = 0.0457^*$  | $F_{1,97} = 4.6517$<br>$P = 0.0342^*$   | $F_{1,97} = 27.5056$<br>$P < 0.0001^*$  | $F_{1,97} = 7.6175$<br>$P = 0.0073^*$  |
| Total ventilation              | NS                                     | $F_{1,99} = 49.9311$<br>$P < 0.0001^*$  | $F_{1,99} = 3.5126$<br>$P = 0.0648$     | $F_{1,99} = 5.5837$<br>$P = 0.0207^*$  |
| Tidal volume                   | NS                                     | $F_{1,99} = 22.2705$<br>$P < 0.0001^*$  | $F_{1,99} = 3.3406$<br>$P = 0.0716$     | $F_{1,99} = 5.1393$<br>$P = 0.0263^*$  |
| Breathing frequency            | NS                                     | $F_{1,100} = 24.9573$<br>$P < 0.0001^*$ | $F_{1,100} < 0.0001$<br>$P = 0.9936$    | NS                                     |

\* $P < 0.05$ . <sup>1</sup>Interaction between acclimation and inspired  $PO_2$ . NS denotes no significant effect of the factor, which was removed from the final statistical model. <sup>2</sup>Mouse family was also included as a random factor in the mixed model as  $0.05 < P < 0.1$ .

**Table S2.** Effects of acclimation to hypoxia and globin genotype on cardiorespiratory physiology in hypoxia of F<sub>2</sub> inter-population hybrid deer mice.

| Trait                              | Animal mass                                | Acclimation                                 | Hb genotype                               | Interaction <sup>1</sup> |
|------------------------------------|--------------------------------------------|---------------------------------------------|-------------------------------------------|--------------------------|
| Hypoxic $\dot{V}O_2$ max           | F <sub>1,41</sub> = 28.0073<br>P < 0.0001* | F <sub>1,41</sub> = 13.0967<br>P = 0.0013*  | F <sub>4,41</sub> = 1.7576<br>P = 0.1764  | NS                       |
| Arterial O <sub>2</sub> saturation | NS                                         | F <sub>1,42</sub> = 15.8951<br>P = 0.0005*  | F <sub>4,42</sub> = 3.0259<br>P = 0.0407* | NS                       |
| Heart rate <sup>2</sup>            | NS                                         | F <sub>1,41</sub> = 10.7106<br>P = 0.0031*  | F <sub>4,41</sub> = 0.7020<br>P = 0.5999  | NS                       |
| Total ventilation                  | NS                                         | F <sub>1,42</sub> = 34.0654<br>P < 0.0001*  | F <sub>4,42</sub> = 0.3396<br>P = 0.8481  | NS                       |
| Tidal volume                       | NS                                         | F <sub>1,42</sub> = 15.9684<br>P = 0.0005*  | F <sub>4,42</sub> = 0.6548<br>P = 0.6300  | NS                       |
| Breathing frequency                | NS                                         | F <sub>1,42</sub> = 23.7780<br>P < 0.0001*  | F <sub>4,42</sub> = 0.5053<br>P = 0.7323  | NS                       |
| Hematocrit                         | NS                                         | F <sub>1,42</sub> = 222.7637<br>P < 0.0001* | F <sub>4,42</sub> = 0.2031<br>P = 0.9338  | NS                       |
| Blood Hb concentration             | NS                                         | F <sub>1,42</sub> = 59.4601<br>P < 0.0001*  | F <sub>4,42</sub> = 1.3807<br>P = 0.2745  | NS                       |
| Red blood cell P <sub>50</sub>     | NS                                         | F <sub>1,42</sub> = 18.8344<br>P = 0.0002*  | F <sub>4,42</sub> = 3.9622<br>P = 0.0150* | NS                       |
| Hill coefficient                   | NS                                         | F <sub>1,42</sub> = 0.0315<br>P = 0.8599    | F <sub>4,42</sub> = 0.2514<br>P = 0.9073  | NS                       |

\*P < 0.05. <sup>1</sup>Interaction between acclimation and globin genotype. NS denotes no significant effect of the factor, which was removed from the final statistical model. <sup>2</sup>Mouse family was also included as a random factor in the mixed model, for which 0.05 < P < 0.1.

**Table S3.** Effects of inspired  $PO_2$  and hemoglobin genotype on cardiorespiratory physiology of  $F_2$  inter-population hybrid deer mice acclimated to normoxia.

| Trait                     | Animal mass                            | $PO_2$                                  | Hb genotype                           | Interaction <sup>1</sup>              |
|---------------------------|----------------------------------------|-----------------------------------------|---------------------------------------|---------------------------------------|
| $\dot{V}O_2$ max          | $F_{1,41} = 31.2238$<br>$P < 0.0001^*$ | $F_{1,41} = 61.0119$<br>$P < 0.0001^*$  | $F_{4,41} = 3.0346$<br>$P = 0.0416^*$ | NS                                    |
| Arterial $O_2$ saturation | NS                                     | $F_{1,41} = 122.1012$<br>$P < 0.0001^*$ | $F_{4,41} = 3.7422$<br>$P = 0.0189^*$ | $F_{4,41} = 3.0674$<br>$P = 0.0389^*$ |
| Heart rate <sup>2</sup>   | NS                                     | $F_{1,41} = 32.4464$<br>$P < 0.0001^*$  | $F_{4,41} = 2.8000$<br>$P = 0.0545$   | NS                                    |
| Total ventilation         | NS                                     | $F_{1,42} = 0.3248$<br>$P = 0.5738$     | $F_{4,42} = 0.6799$<br>$P = 0.6136$   | NS                                    |
| Tidal volume              | NS                                     | $F_{1,42} = 0.1428$<br>$P = 0.7087$     | $F_{4,42} = 1.4425$<br>$P = 0.2551$   | NS                                    |
| Breathing frequency       | $F_{1,41} = 5.9183$<br>$P = 0.0242^*$  | $F_{1,41} = 0.8443$<br>$P = 0.3669$     | $F_{4,41} = 1.0643$<br>$P = 0.3999$   | NS                                    |
| Hematocrit                | NS                                     | NA                                      | $F_{4,21} = 0.3604$<br>$P = 0.8339$   | NA                                    |
| Blood Hb concentration    | NS                                     | NA                                      | $F_{4,21} = 0.2008$<br>$P = 0.9351$   | NA                                    |
| Red blood cell $P_{50}$   | NS                                     | NA                                      | $F_{4,21} = 5.1298$<br>$P = 0.0048^*$ | NA                                    |
| Hill coefficient          | NS                                     | NA                                      | $F_{4,21} = 0.4016$<br>$P = 0.8053$   | NA                                    |

\* $P < 0.05$ . <sup>1</sup>Interaction between inspired  $PO_2$  and globin genotype. NS denotes no significant effect of the factor, which was removed from the final statistical model. NA, not applicable.

<sup>2</sup>Mouse family was also included as a random factor in the mixed model, for which  $P < 0.05$ .

**Table S4.** Effects of acclimation to hypoxia and globin genotype on cardiorespiratory physiology in normoxia of F<sub>2</sub> inter-population hybrid deer mice.

| Trait                              | Animal mass                                | Acclimation                                | Hb genotype                               | Interaction <sup>1</sup> |
|------------------------------------|--------------------------------------------|--------------------------------------------|-------------------------------------------|--------------------------|
| Normoxic $\dot{V}O_2\text{max}^2$  | F <sub>1,40</sub> = 23.2664<br>P < 0.0001* | F <sub>1,40</sub> = 4.2325<br>P = 0.0502   | F <sub>4,40</sub> = 1.6212<br>P = 0.2115  | NS                       |
| Arterial O <sub>2</sub> saturation | F <sub>1,41</sub> = 15.3290<br>P = 0.0003* | F <sub>1,41</sub> = 0.4014<br>P = 0.5296   | F <sub>4,41</sub> = 2.9739<br>P = 0.0291* | NS                       |
| Heart rate <sup>2</sup>            | F <sub>1,40</sub> = 4.8558<br>P = 0.0381*  | F <sub>1,40</sub> = 0.1977<br>P = 0.6605   | F <sub>4,40</sub> = 2.6116<br>P = 0.0698  | NS                       |
| Total ventilation                  | NS                                         | F <sub>1,42</sub> = 22.9660<br>P < 0.0001* | F <sub>4,42</sub> = 0.3536<br>P = 0.8386  | NS                       |
| Tidal volume                       | F <sub>1,41</sub> = 5.1639<br>P = 0.0317*  | F <sub>1,41</sub> = 3.1282<br>P = 0.0892   | F <sub>4,41</sub> = 1.5707<br>P = 0.2199  | NS                       |
| Breathing frequency                | NS                                         | F <sub>1,42</sub> = 8.0995<br>P = 0.0087*  | F <sub>4,42</sub> = 0.6049<br>P = 0.6634  | NS                       |

\*P < 0.05. <sup>1</sup>Interaction between acclimation and globin genotype. NS denotes no significant effect of the factor, which was removed from the final statistical model. <sup>2</sup>Mouse family was also included as a random factor in the mixed model as P < 0.05.

**Table S5.** Parameters used to generate the initial solution in the model of the oxygen transport pathway representing the ‘ancestral condition’ with the most lowland  $P_{50}$ .

| Variable                                                                    | Value  |
|-----------------------------------------------------------------------------|--------|
| <i>Measured input parameters</i>                                            |        |
| $P_B$ (kPa)                                                                 | 101    |
| $F_{I}O_2$                                                                  | 0.123  |
| $\dot{V}$ (ml min <sup>-1</sup> g <sup>-1</sup> )                           | 4.96   |
| $V_T$ (μl g <sup>-1</sup> )                                                 | 13.0   |
| [Hb] (g dl <sup>-1</sup> )                                                  | 14.2   |
| $P_{50}$ (kPa)                                                              | 4.84   |
| $n$                                                                         | 2.85   |
| $T_b$ (°C)                                                                  | 31.4   |
| <i>Estimated input parameters</i>                                           |        |
| $V_D$ (μl g <sup>-1</sup> )*                                                | 6.40   |
| $\dot{Q}$ (ml min <sup>-1</sup> g <sup>-1</sup> ) †                         | 1.06   |
| <i>Calculated input parameters</i>                                          |        |
| $D_{L}O_2$ (ml kPa <sup>-1</sup> min <sup>-1</sup> )                        | 0.0661 |
| $D_{T}O_2$ (ml kPa <sup>-1</sup> min <sup>-1</sup> )                        | 0.0322 |
| <i>Output parameters (ancestral values shown)</i>                           |        |
| <b><math>P_AO_2</math></b> (kPa)                                            | 7.18   |
| <b><math>P_aO_2</math></b> (kPa) †                                          | 6.85   |
| <b><math>P_vO_2</math></b> (kPa) †                                          | 2.29   |
| <b><math>\dot{V}O_{2max}</math></b> (ml min <sup>-1</sup> g <sup>-1</sup> ) | 0.131  |

$P_B$ , barometric pressure;  $F_{I}O_2$ , inspired oxygen fraction;  $\dot{V}O_{2max}$ , maximal oxygen consumption rate measured during acute cold exposure;  $\dot{V}$ , total ventilation;  $V_T$ , tidal volume; [Hb], blood hemoglobin concentration;  $P_{50}$ ,  $PO_2$  at 50%  $O_2$  saturation;  $n$ , Hill coefficient;  $P_aO_2$ , arterial  $O_2$  tension;  $T_b$ , body temperature;  $V_D$ , dead space volume;  $\dot{Q}$ , cardiac output;  $P_vO_2$ , mixed venous  $O_2$  tension;  $P_AO_2$ , alveolar  $O_2$  tension;  $D_{L}O_2$ ,  $O_2$  diffusing capacity of the lungs;  $D_{T}O_2$ ,  $O_2$  diffusing capacity of the tissues. \*Indicates value was taken from Fallica *et al* 2011 (1). †Indicates value was taken from, or calculated using, data in Tate *et al* 2020 (2). Variables in bold were then calculated by the model in our sensitivity analysis in response to changes in  $D_{T}O_2$  and/or  $P_{50}$ .

## References

1. J. Fallica, S. Das, M. Horton, W. Mitzner, Application of carbon monoxide diffusing capacity in the mouse lung. *J. Appl. Physiol.* **110**, 1455-1459 (2011).
2. K. B. Tate *et al.*, Coordinated changes across the O<sub>2</sub> transport pathway underlie adaptive increases in thermogenic capacity in high-altitude deer mice. *Proc. R. Soc. London., B, Biol. Sci.* **287**, 20192750 (2020).
