# Supplementary material for: The adaptive benefit of evolved increases in hemoglobin-O2 affinity is contingent on tissue O2 diffusing capacity in high-altitude deer mice
Source: PubMed Central journal article supplement (PMC8218429; doi:10.1186/s12915-021-01059-4), 2021-06-22

$VO_2\text{max}$

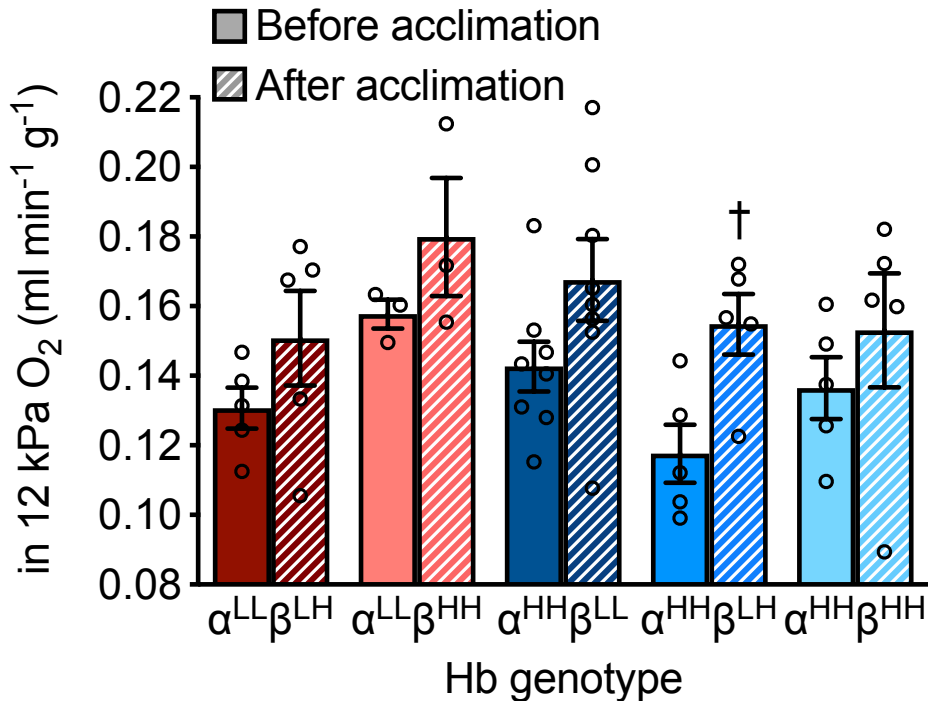

Supplement: 12915_2021_1059_MOESM6_ESM.pdf [file 12915_2021_1059_MOESM6_ESM.pdf]
